# Supplementary material for: Coordination assemblies of the MII-tm/bpt (M = Zn/Cd/Co/Ni) mixed-ligand system: positional isomeric effect, structural diversification and properties
Source: Royal Society of Chemistry journal article supplement (doi:10.1039/c4ra03545c), 2014-01-01
Supplement: c4ra03545c1.pdf [file c4ra03545c1.pdf]

## Supplementary Material

### **Coordination assemblies of the $M^{II}$ -tm/bpt ( $M = Zn/Cd/Co/Ni$ ) mixed-ligand system: positional isomeric effect, structural diversification and properties**

*Manuscript Authors:* Fu-Ping Huang,<sup>a,b</sup> Peng-Fei Yao,<sup>a</sup> Wei Luo,<sup>a</sup> Hai-Ye Li,<sup>a</sup> Qing Yu,<sup>a</sup> He-Dong Bian,<sup>\*a</sup> Shi-Ping Yan,<sup>\*b</sup>

<sup>a</sup> Key Laboratory for the Chemistry and Molecular Engineering of Medicinal Resources (School of Chemistry and Pharmacy, Guangxi Normal University), Ministry of Education of China, Guilin, 541004, P. R. China.

<sup>b</sup> Department of Chemistry, Nankai University, Tianjin 300071, PR China.

---

\* Corresponding author.: H.D. [gxunchem@163.com](mailto:gxunchem@163.com); S. P. [yansp@nankai.edu.cn](mailto:yansp@nankai.edu.cn);

Table S1. Selected Hydrogen-bond Geometry (Å) for complex **6**

| $D-H\cdots A$            | $D-H$ | $H\cdots A$ | $D\cdots A$ | $D-H\cdots A$ |
|--------------------------|-------|-------------|-------------|---------------|
| <b>6</b>                 |       |             |             |               |
| N3—H3 $\cdots$ O2vi      | 0.87  | 1.92        | 2.793 (13)  | 176           |
| O7—H7A $\cdots$ O2       | 0.86  | 1.88        | 2.663 (9)   | 151           |
| O7—H7B $\cdots$ O11vii   | 0.85  | 2.48        | 2.967 (14)  | 117           |
| O7—H7B $\cdots$ O10viii  | 0.85  | 2.17        | 2.993 (18)  | 150           |
| N8—H8 $\cdots$ O9        | 0.87  | 2.02        | 2.717 (13)  | 137           |
| O8—H8A $\cdots$ O6ix     | 0.85  | 2.00        | 2.761 (15)  | 148           |
| O8—H8B $\cdots$ O10viii  | 0.85  | 2.01        | 2.84 (2)    | 168           |
| O10—H10B $\cdots$ N7viii | 0.86  | 2.14        | 3.00 (2)    | 176           |
| O10—H10C $\cdots$ O2x    | 0.84  | 1.90        | 2.740 (18)  | 175           |
| O11—H11A $\cdots$ O10xi  | 0.85  | 2.16        | 3.01 (12)   | 177           |
| O11—H11B $\cdots$ N4ix   | 0.84  | 2.17        | 3.000 (14)  | 175           |

Symmetry codes: (vi)  $-x+2, -y, -z+2$ ; (vii)  $x, y-1, z$ ; (viii)  $-x+1, -y+1, -z+1$ ; (ix)  $x, y+1, z-1$ ; (x)  $x-1, y+1, z$ ; (xi)  $x+1, y, z$ .

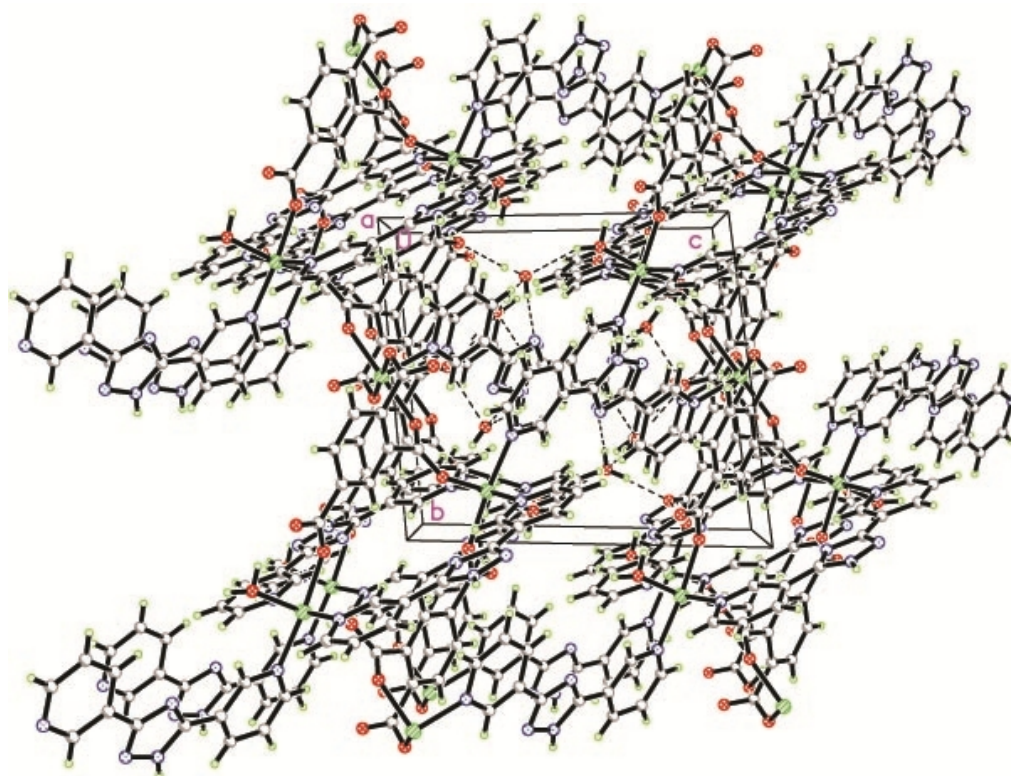Fig S1. Show the 3-D packing drawing of **6**.

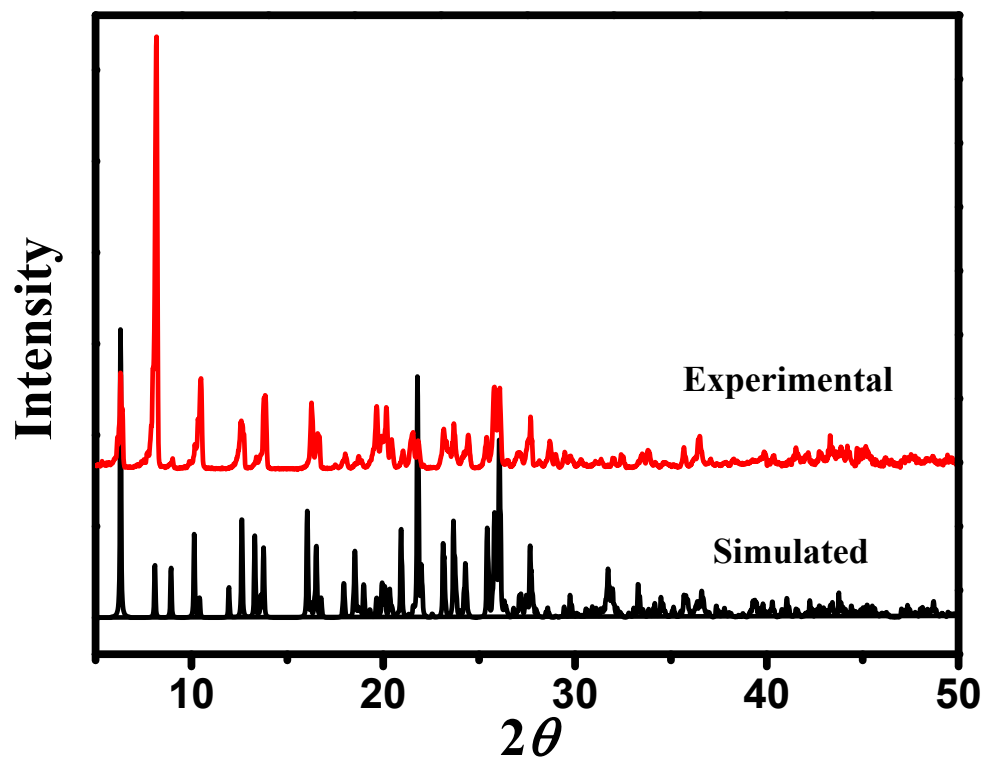

Fig S2. Measured and calculated powder X-ray diffraction (PXRD) pattern of 1.

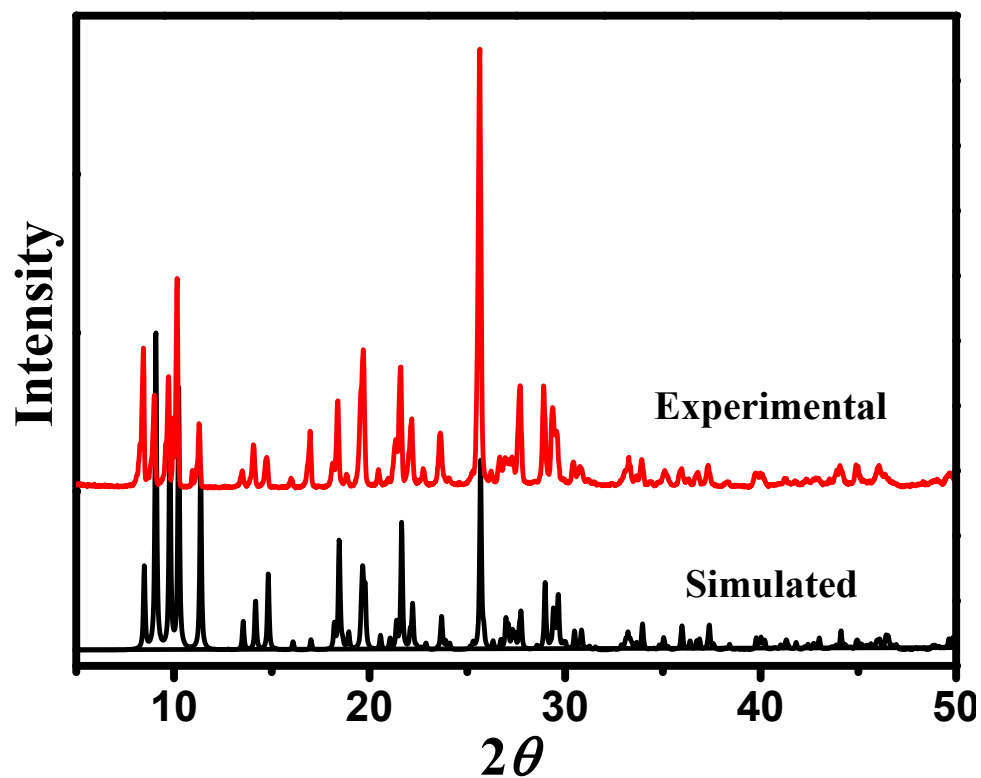

Fig S3. Measured and calculated powder X-ray diffraction (PXRD) pattern of 2.

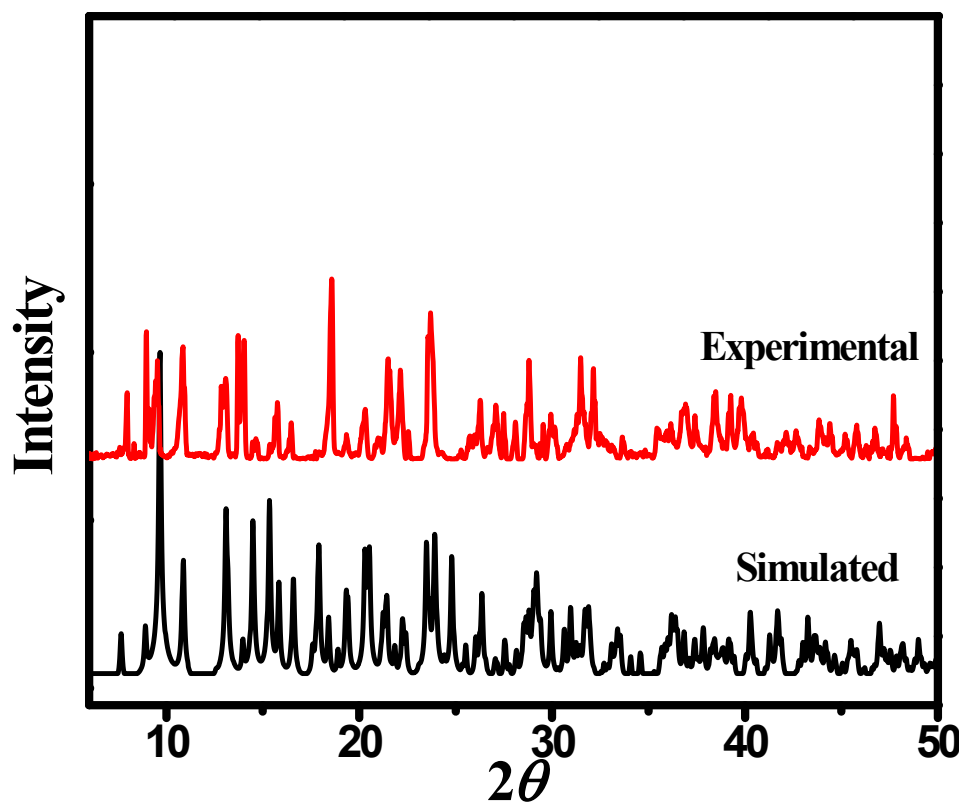

Fig S4. Measured and calculated powder X-ray diffraction (PXRD) pattern of 3.

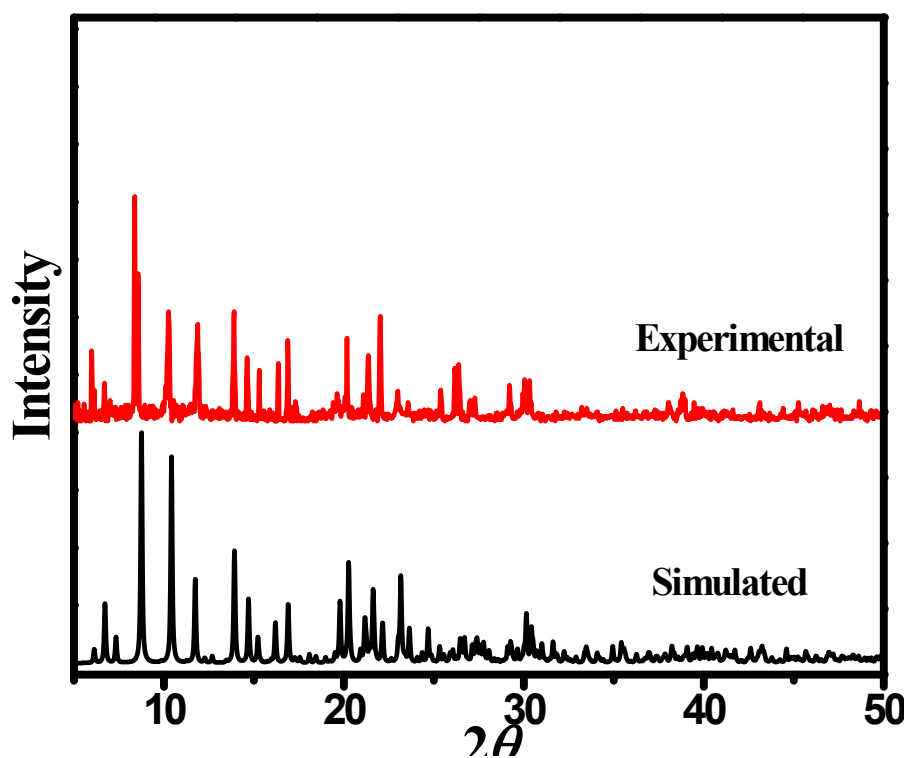

Fig S5. Measured and calculated powder X-ray diffraction (PXRD) pattern of 4.

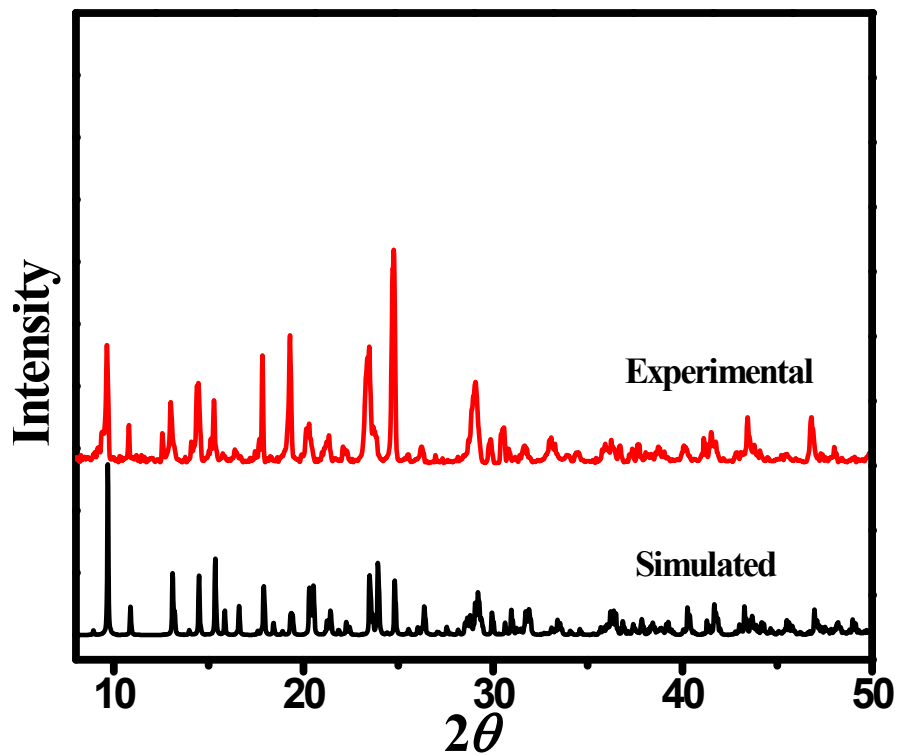

Fig S6. Measured and calculated powder X-ray diffraction (PXRD) pattern of 5.

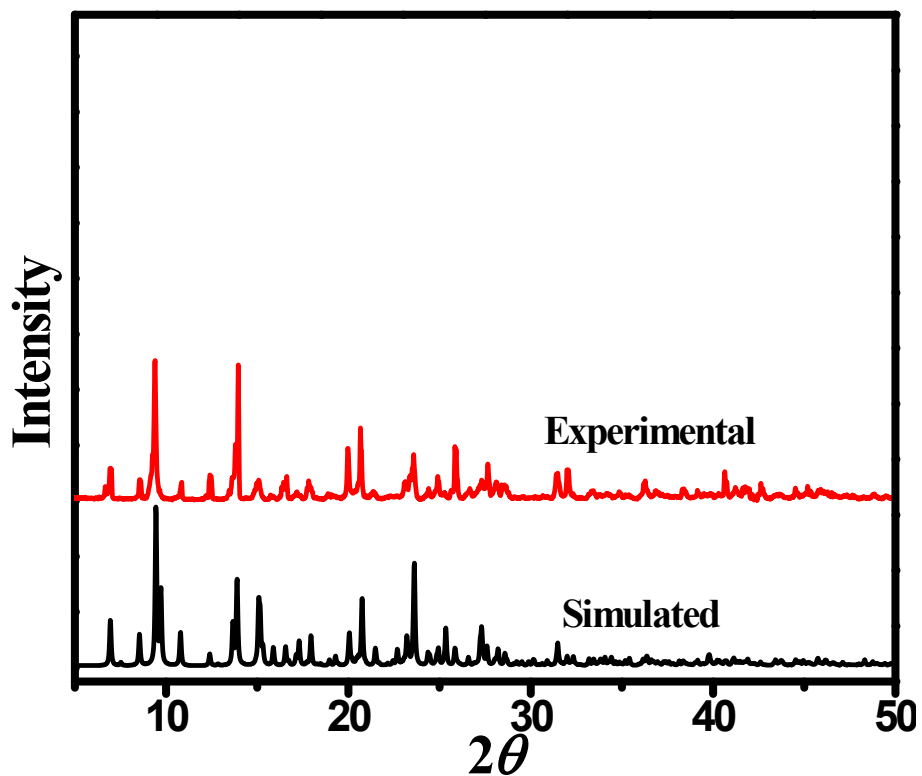

Fig S7. Measured and calculated powder X-ray diffraction (PXRD) pattern of 6.

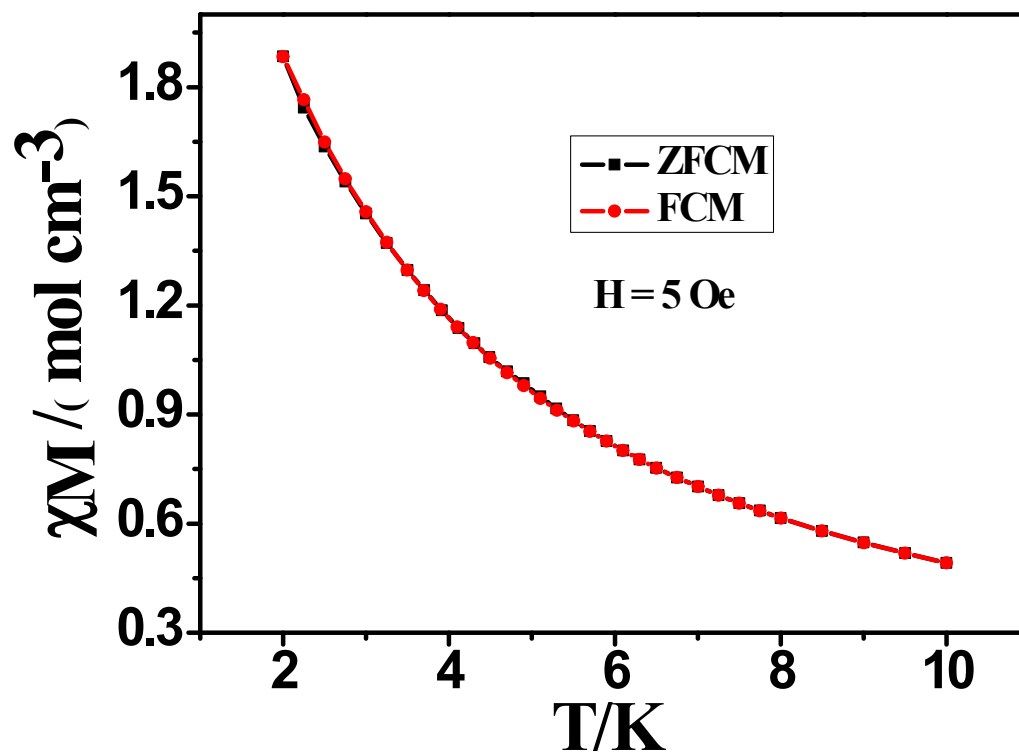

Fig S8. Plots of zero-field cooled magnetization (ZFC) and field-cooled magnetization (FC) and in a field of 5 Oe for 1 using a SQUID.
